# Supplementary material for: Ensemble Models for Tick Vectors: Standard Surveys Compared with Convenience Samples
Source: MDPI journal article supplement (doi:10.3390/diseases10020032), 2022-06-08

Supplemental Table S1. Performance metrics associated with the five modeling algorithms for each species. Threshold is the value of the continuous score used to delineate presence from absence when sensitivity = specificity. AUC is the area under the Receiver Operator Characteristic curves. Accuracy is the ratio of sum of correctly predicted presence and absence to the sample size from cross validations.

| <i>Amblyomma americanum</i> | Threshold | AUC  | SE   | Accuracy CV |
|-----------------------------|-----------|------|------|-------------|
| Logistic                    | 0.26      | 0.80 | 0.05 | 0.96        |
| BRT                         | 0.28      | 0.72 | 0.04 | 0.92        |
| RF                          | 0.24      | 0.72 | 0.05 | 0.93        |
| MARS                        | 0.27      | 0.75 | 0.04 | 0.83        |
| MaxEnt                      | 0.35      | 0.77 | 0.04 | 0.96        |
| <i>Ixodes scapularis</i>    | Threshold | AUC  | SE   | Accuracy CV |
| Logistic                    | 0.22      | 0.78 | 0.03 | 0.82        |
| BRT                         | 0.29      | 0.70 | 0.04 | 0.88        |
| RF                          | 0.25      | 0.74 | 0.04 | 0.90        |
| MARS                        | 0.27      | 0.65 | 0.04 | 0.83        |
| MaxEnt                      | 0.34      | 0.79 | 0.04 | 0.84        |

Supplemental Table S2. Omission error sites of convenience samples with location, URL to imagery, distance to nearest standard SDM location and details of location.

|        |           |            | <i>Ixodes scapularis</i> convenience samples                                                                                                                                                                                                                                                                                                                |               |                                |
|--------|-----------|------------|-------------------------------------------------------------------------------------------------------------------------------------------------------------------------------------------------------------------------------------------------------------------------------------------------------------------------------------------------------------|---------------|--------------------------------|
| ID     | Lat.      | Long.      | Image                                                                                                                                                                                                                                                                                                                                                       | Dist. SDM (m) | Local Site                     |
| 23     | 30.284110 | -84.151350 | <a href="https://www.google.com/maps/place/30%C2%B017'02.8%22N+84%C2%B009'04.9%22W/@30.2840492,-84.1514955,97m/data=!3m1!1e3!4m5!3m4!1s0x0:0x0!8m2!3d30.28411!4d-84.15135">https://www.google.com/maps/place/30%C2%B017'02.8%22N+84%C2%B009'04.9%22W/@30.2840492,-84.1514955,97m/data=!3m1!1e3!4m5!3m4!1s0x0:0x0!8m2!3d30.28411!4d-84.15135</a>             | 100           | parking lot                    |
| 31     | 30.211416 | -84.749755 | <a href="https://www.google.com/maps/place/30%C2%B012'41.1%22N+84%C2%B044'59.1%22W/@30.211416,-84.7519437,777m/data=!3m2!1e3!4b1!4m5!3m4!1s0x0:0x0!8m2!3d30.211416!4d-84.749755">https://www.google.com/maps/place/30%C2%B012'41.1%22N+84%C2%B044'59.1%22W/@30.211416,-84.7519437,777m/data=!3m2!1e3!4b1!4m5!3m4!1s0x0:0x0!8m2!3d30.211416!4d-84.749755</a> | 100           | OK?                            |
| 121    | 30.082560 | -84.171700 | <a href="https://www.google.com/maps/place/30%C2%B004'57.2%22N+84%C2%B010'18.1%22W/@30.08256,-84.1760774,1557m/data=!3m1!1e3!4m5!3m4!1s0x0:0x0!8m2!3d30.08256!4d-84.1717">https://www.google.com/maps/place/30%C2%B004'57.2%22N+84%C2%B010'18.1%22W/@30.08256,-84.1760774,1557m/data=!3m1!1e3!4m5!3m4!1s0x0:0x0!8m2!3d30.08256!4d-84.1717</a>               | 100           | OK? Mudflat at low tide        |
| 128    | 30.053600 | -84.530000 | <a href="https://www.google.com/maps/place/30%C2%B003'13.0%22N+84%C2%B031'48.0%22W/@30.0545565,-84.528337,779m/data=!3m1!1e3!4m5!3m4!1s0x0:0x0!8m2!3d30.0536!4d-84.53">https://www.google.com/maps/place/30%C2%B003'13.0%22N+84%C2%B031'48.0%22W/@30.0545565,-84.528337,779m/data=!3m1!1e3!4m5!3m4!1s0x0:0x0!8m2!3d30.0536!4d-84.53</a>                     | 100           | OK? How far SW Sopchoppy?      |
| 240    | 28.037400 | -81.799800 | <a href="https://www.google.com/maps/place/28%C2%B002'14.6%22N+81%C2%B047'59.3%22W/@28.0374,-81.8085547,3176m/data=!3m1!1e3!4m5!3m4!1s0x0:0x0!8m2!3d28.0374!4d-81.7998">https://www.google.com/maps/place/28%C2%B002'14.6%22N+81%C2%B047'59.3%22W/@28.0374,-81.8085547,3176m/data=!3m1!1e3!4m5!3m4!1s0x0:0x0!8m2!3d28.0374!4d-81.7998</a>                   | 100           | poorly defined region          |
| 284    | 25.192680 | -80.355360 | <a href="https://www.google.com/maps/place/25%C2%B011'33.7%22N+80%C2%B021'19.3%22W/@25.19268,-80.4253978,26047m/data=!3m1!1e3!4m5!3m4!1s0x0:0x0!8m2!3d25.19268!4d-80.35536">https://www.google.com/maps/place/25%C2%B011'33.7%22N+80%C2%B021'19.3%22W/@25.19268,-80.4253978,26047m/data=!3m1!1e3!4m5!3m4!1s0x0:0x0!8m2!3d25.19268!4d-80.35536</a>           | 100           | OK? On roadside                |
| DPI 11 | 27.886344 | -82.389488 | <a href="#">Old US 41 &amp; Burts Rd (SE corner of), Tampa - Bing</a>                                                                                                                                                                                                                                                                                       | 100           | OK? Intersect but gives corner |

|          |           |            |                                                                                                                                                                                                                                                                                                                                                             |     |                                                        |
|----------|-----------|------------|-------------------------------------------------------------------------------------------------------------------------------------------------------------------------------------------------------------------------------------------------------------------------------------------------------------------------------------------------------------|-----|--------------------------------------------------------|
| DP<br>12 | 28.282292 | -80.607286 | <a href="#">South 24th Street; Cocoa Beach - Bing</a>                                                                                                                                                                                                                                                                                                       | 100 | OK? Single house; short street segment                 |
| 129      | 30.047900 | -84.417100 | <a href="https://www.google.com/maps/place/30%C2%B002'52.4%22N+84%C2%B025'01.6%22W/@30.0443894,-84.4210268,3115m/data=!3m1!1e3!4m5!3m4!1s0x0:0x0!8m2!3d30.0479!4d-84.4171">https://www.google.com/maps/place/30%C2%B002'52.4%22N+84%C2%B025'01.6%22W/@30.0443894,-84.4210268,3115m/data=!3m1!1e3!4m5!3m4!1s0x0:0x0!8m2!3d30.0479!4d-84.4171</a>             | 141 | OK?                                                    |
| 134      | 30.034730 | -84.462150 | <a href="https://www.google.com/maps/place/30%C2%B002'05.0%22N+84%C2%B027'43.7%22W/@30.0366085,-84.4653982,1557m/data=!3m1!1e3!4m5!3m4!1s0x0:0x0!8m2!3d30.03473!4d-84.46215">https://www.google.com/maps/place/30%C2%B002'05.0%22N+84%C2%B027'43.7%22W/@30.0366085,-84.4653982,1557m/data=!3m1!1e3!4m5!3m4!1s0x0:0x0!8m2!3d30.03473!4d-84.46215</a>         | 141 | OK?                                                    |
| 237      | 28.043400 | -82.266500 | <a href="https://www.google.com/maps/place/28%C2%B002'36.2%22N+82%C2%B015'59.4%22W/@28.0434,-82.2752547,3176m/data=!3m1!1e3!4m5!3m4!1s0x0:0x0!8m2!3d28.0434!4d-82.2665">https://www.google.com/maps/place/28%C2%B002'36.2%22N+82%C2%B015'59.4%22W/@28.0434,-82.2752547,3176m/data=!3m1!1e3!4m5!3m4!1s0x0:0x0!8m2!3d28.0434!4d-82.2665</a>                   | 141 | OK?                                                    |
| DPI<br>1 | 28.019187 | -82.133439 | <a href="#">507 Whitehall St, Tampa - Bing</a>                                                                                                                                                                                                                                                                                                              | 141 | OK? only address on street; wooded habitat on property |
| 37       | 30.194527 | -84.766672 | <a href="https://www.google.com/maps/place/30%C2%B011'40.3%22N+84%C2%B046'00.0%22W/@30.1926631,-84.767584,728m/data=!3m1!1e3!4m5!3m4!1s0x0:0x0!8m2!3d30.194527!4d-84.766672">https://www.google.com/maps/place/30%C2%B011'40.3%22N+84%C2%B046'00.0%22W/@30.1926631,-84.767584,728m/data=!3m1!1e3!4m5!3m4!1s0x0:0x0!8m2!3d30.194527!4d-84.766672</a>         | 200 | center line                                            |
| 38       | 30.196688 | -84.727574 | <a href="https://www.google.com/maps/place/30%C2%B011'48.1%22N+84%C2%B043'39.3%22W/@30.196688,-84.7297627,777m/data=!3m2!1e3!4b1!4m5!3m4!1s0x0:0x0!8m2!3d30.196688!4d-84.727574">https://www.google.com/maps/place/30%C2%B011'48.1%22N+84%C2%B043'39.3%22W/@30.196688,-84.7297627,777m/data=!3m2!1e3!4b1!4m5!3m4!1s0x0:0x0!8m2!3d30.196688!4d-84.727574</a> | 200 | OK? Intersect                                          |

|     |           |            |                                                                                                                                                                                                                                                                                                                                                                                                                                                                                                                                         |     |                                                       |
|-----|-----------|------------|-----------------------------------------------------------------------------------------------------------------------------------------------------------------------------------------------------------------------------------------------------------------------------------------------------------------------------------------------------------------------------------------------------------------------------------------------------------------------------------------------------------------------------------------|-----|-------------------------------------------------------|
| 40  | 30.181999 | -84.754825 | <a href="https://www.google.com/maps/place/30%C2%B010'55.2%22N+84%C2%B045'17.4%22W/@30.1821068,-84.754766,97m/data=!3m1!1e3!4m13!1m7!3m6!1s0x0:0x0!2zMzDCsDEwJzU1LjliTiA4NMKwNDUnMTcuNCjX!3b1!8m2!3d30.181999!4d-84.754825!3m4!1s0x0:0x0!8m2!3d30.181999!4d-84.754825">https://www.google.com/maps/place/30%C2%B010'55.2%22N+84%C2%B045'17.4%22W/@30.1821068,-84.754766,97m/data=!3m1!1e3!4m13!1m7!3m6!1s0x0:0x0!2zMzDCsDEwJzU1LjliTiA4NMKwNDUnMTcuNCjX!3b1!8m2!3d30.181999!4d-84.754825!3m4!1s0x0:0x0!8m2!3d30.181999!4d-84.754825</a> | 200 | OK?                                                   |
| 260 | 27.806805 | -81.498938 | <a href="https://www.google.com/maps/place/27%C2%B048'24.5%22N+81%C2%B029'56.2%22W/@27.806805,-81.6390137,50921m/data=!3m1!1e3!4m5!3m4!1s0x0:0x0!8m2!3d27.806805!4d-81.498938">https://www.google.com/maps/place/27%C2%B048'24.5%22N+81%C2%B029'56.2%22W/@27.806805,-81.6390137,50921m/data=!3m1!1e3!4m5!3m4!1s0x0:0x0!8m2!3d27.806805!4d-81.498938</a>                                                                                                                                                                                 | 200 | multiple lots;<br>area to West<br>of selected<br>site |
| 27  | 30.239313 | -84.269727 | <a href="https://www.google.com/maps/place/30%C2%B014'21.5%22N+84%C2%B016'11.0%22W/@30.2385715,-84.2895539,6217m/data=!3m1!1e3!4m5!3m4!1s0x0:0x0!8m2!3d30.239313!4d-84.269727">https://www.google.com/maps/place/30%C2%B014'21.5%22N+84%C2%B016'11.0%22W/@30.2385715,-84.2895539,6217m/data=!3m1!1e3!4m5!3m4!1s0x0:0x0!8m2!3d30.239313!4d-84.269727</a>                                                                                                                                                                                 | 224 | road center                                           |
| 153 | 30.030100 | -84.408300 | <a href="https://www.google.com/maps/place/30%C2%B001'48.4%22N+84%C2%B024'29.9%22W/@30.0291154,-84.4093622,389m/data=!3m1!1e3!4m5!3m4!1s0x0:0x0!8m2!3d30.0301!4d-84.4083">https://www.google.com/maps/place/30%C2%B001'48.4%22N+84%C2%B024'29.9%22W/@30.0291154,-84.4093622,389m/data=!3m1!1e3!4m5!3m4!1s0x0:0x0!8m2!3d30.0301!4d-84.4083</a>                                                                                                                                                                                           | 224 | poorly<br>defined<br>region<br>centroid of<br>parcel  |
| 263 | 27.468300 | -82.695500 | <a href="https://www.google.com/maps/place/27%C2%B028'05.9%22N+82%C2%B041'43.8%22W/@27.4683,-82.6976887,798m/data=!3m2!1e3!4b1!4m5!3m4!1s0x0:0x0!8m2!3d27.4683!4d-82.6955">https://www.google.com/maps/place/27%C2%B028'05.9%22N+82%C2%B041'43.8%22W/@27.4683,-82.6976887,798m/data=!3m2!1e3!4b1!4m5!3m4!1s0x0:0x0!8m2!3d27.4683!4d-82.6955</a>                                                                                                                                                                                         | 224 | geocoded to<br>Tampa Bay                              |

|          |           |            |                                                                                                                                                                                                                                                                                                                                                         |     |                                                        |
|----------|-----------|------------|---------------------------------------------------------------------------------------------------------------------------------------------------------------------------------------------------------------------------------------------------------------------------------------------------------------------------------------------------------|-----|--------------------------------------------------------|
| 281      | 25.221430 | -81.082350 | <a href="https://www.google.com/maps/place/25%C2%B013'17.2%22N+81%C2%B004'56.5%22W/@25.22143,-81.1523878,26040m/data=!3m1!1e3!4m5!3m4!1s0x0:0x0!8m2!3d25.22143!4d-81.08235">https://www.google.com/maps/place/25%C2%B013'17.2%22N+81%C2%B004'56.5%22W/@25.22143,-81.1523878,26040m/data=!3m1!1e3!4m5!3m4!1s0x0:0x0!8m2!3d25.22143!4d-81.08235</a>       | 224 | location<br>insufficient<br>but forests<br>occur there |
| DPI<br>2 | 27.201662 | -81.930490 | <a href="#">Bing Maps - Directions, trip planning, traffic cameras &amp; more</a>                                                                                                                                                                                                                                                                       | 224 | intersect                                              |
| 22       | 30.294700 | -84.185100 | <a href="https://www.google.com/maps/place/30%C2%B017'40.9%22N+84%C2%B011'06.4%22W/@30.2947,-84.2201189,12427m/data=!3m1!1e3!4m5!3m4!1s0x0:0x0!8m2!3d30.2947!4d-84.1851">https://www.google.com/maps/place/30%C2%B017'40.9%22N+84%C2%B011'06.4%22W/@30.2947,-84.2201189,12427m/data=!3m1!1e3!4m5!3m4!1s0x0:0x0!8m2!3d30.2947!4d-84.1851</a>             | 283 | uncertain<br>location                                  |
| 269      | 26.003000 | -81.605200 | <a href="https://www.google.com/maps/place/26%C2%B000'10.8%22N+81%C2%B036'18.7%22W/@26.003,-81.6227095,6468m/data=!3m1!1e3!4m5!3m4!1s0x0:0x0!8m2!3d26.003!4d-81.6052">https://www.google.com/maps/place/26%C2%B000'10.8%22N+81%C2%B036'18.7%22W/@26.003,-81.6227095,6468m/data=!3m1!1e3!4m5!3m4!1s0x0:0x0!8m2!3d26.003!4d-81.6052</a>                   | 283 | vague<br>location;<br>midline of<br>road               |
| 1        | 30.811720 | -85.226460 | <a href="https://www.google.com/maps/place/30%C2%B048'42.2%22N+85%C2%B013'35.3%22W/@30.81172,-85.2439695,5787m/data=!3m1!1e3!4m5!3m4!1s0x0:0x0!8m2!3d30.81172!4d-85.22646">https://www.google.com/maps/place/30%C2%B048'42.2%22N+85%C2%B013'35.3%22W/@30.81172,-85.2439695,5787m/data=!3m1!1e3!4m5!3m4!1s0x0:0x0!8m2!3d30.81172!4d-85.22646</a>         | 316 | Visitors<br>Center                                     |
| 200      | 29.611081 | -82.921459 | <a href="https://www.google.com/maps/place/29%C2%B036'39.9%22N+82%C2%B055'17.3%22W/@29.5956332,-82.9290121,6257m/data=!3m1!1e3!4m5!3m4!1s0x0:0x0!8m2!3d29.611081!4d-82.921459">https://www.google.com/maps/place/29%C2%B036'39.9%22N+82%C2%B055'17.3%22W/@29.5956332,-82.9290121,6257m/data=!3m1!1e3!4m5!3m4!1s0x0:0x0!8m2!3d29.611081!4d-82.921459</a> | 316 | OK?                                                    |

|       |           |            |                                                                                                                                                                                                                                                                                                                                                   |     |                                                          |
|-------|-----------|------------|---------------------------------------------------------------------------------------------------------------------------------------------------------------------------------------------------------------------------------------------------------------------------------------------------------------------------------------------------|-----|----------------------------------------------------------|
| 4     | 30.772870 | -85.216360 | <a href="https://www.google.com/maps/place/30%C2%B046'22.3%22N+85%C2%B012'58.9%22W/@30.77287,-85.2338695,5789m/data=!3m1!1e3!4m5!3m4!1s0x0:0x0!8m2!3d30.77287!4d-85.21636">https://www.google.com/maps/place/30%C2%B046'22.3%22N+85%C2%B012'58.9%22W/@30.77287,-85.2338695,5789m/data=!3m1!1e3!4m5!3m4!1s0x0:0x0!8m2!3d30.77287!4d-85.21636</a>   | 361 | in the water                                             |
| 124   | 30.069200 | -84.388900 | <a href="https://www.google.com/maps/place/30%C2%B004'09.1%22N+84%C2%B023'20.0%22W/@30.0619574,-84.3965389,3114m/data=!3m1!1e3!4m5!3m4!1s0x0:0x0!8m2!3d30.0692!4d-84.3889">https://www.google.com/maps/place/30%C2%B004'09.1%22N+84%C2%B023'20.0%22W/@30.0619574,-84.3965389,3114m/data=!3m1!1e3!4m5!3m4!1s0x0:0x0!8m2!3d30.0692!4d-84.3889</a>   | 412 | How far south of Carraway Cutoff; which side of road?    |
| 274   | 25.444000 | -80.466300 | <a href="https://www.google.com/maps/place/25%C2%B026'38.4%22N+80%C2%B027'58.7%22W/@25.4514403,-80.5090437,12996m/data=!3m1!1e3!4m5!3m4!1s0x0:0x0!8m2!3d25.444!4d-80.4663">https://www.google.com/maps/place/25%C2%B026'38.4%22N+80%C2%B027'58.7%22W/@25.4514403,-80.5090437,12996m/data=!3m1!1e3!4m5!3m4!1s0x0:0x0!8m2!3d25.444!4d-80.4663</a>   | 412 | intersect major roads                                    |
| DPI 3 | 27.733053 | -80.441699 | <a href="#">Hobart Park, NW Cor. of 58 Ave. &amp; 77 Street, Wabasso, fl - Google Maps</a>                                                                                                                                                                                                                                                        | 424 | Intersect and codes to park building                     |
| DPI 4 | 27.018985 | -82.275025 | <a href="#">North Port - Bing Maps</a>                                                                                                                                                                                                                                                                                                            | 447 | road segment 800 m; vague address; typo - North Port, FL |
| 143   | 30.032570 | -84.490390 | <a href="https://www.google.com/maps/place/30%C2%B001'57.3%22N+84%C2%B029'25.4%22W/@30.0346413,-84.4946923,779m/data=!3m1!1e3!4m5!3m4!1s0x0:0x0!8m2!3d30.03257!4d-84.49039">https://www.google.com/maps/place/30%C2%B001'57.3%22N+84%C2%B029'25.4%22W/@30.0346413,-84.4946923,779m/data=!3m1!1e3!4m5!3m4!1s0x0:0x0!8m2!3d30.03257!4d-84.49039</a> | 447 | multiple sand tracks                                     |

|     |           |            |                                                                                                                                                                                                                                                                                                                                                       |     |                                                          |
|-----|-----------|------------|-------------------------------------------------------------------------------------------------------------------------------------------------------------------------------------------------------------------------------------------------------------------------------------------------------------------------------------------------------|-----|----------------------------------------------------------|
| 199 | 29.605349 | -83.124611 | <a href="https://www.google.com/maps/place/29%C2%B036'19.3%22N+83%C2%B007'28.6%22W/@29.6060579,-83.1255337,782m/data=!3m1!1e3!4m5!3m4!1s0x0:0x0!8m2!3d29.605349!4d-83.124611">https://www.google.com/maps/place/29%C2%B036'19.3%22N+83%C2%B007'28.6%22W/@29.6060579,-83.1255337,782m/data=!3m1!1e3!4m5!3m4!1s0x0:0x0!8m2!3d29.605349!4d-83.124611</a> | 447 | which woodlot?; poorly defined region centroid of parcel |
| 277 | 25.394510 | -80.617680 | <a href="https://www.google.com/maps/place/25%C2%B023'40.2%22N+80%C2%B037'03.7%22W/@25.3957506,-80.7028241,52006m/data=!3m1!1e3!4m5!3m4!1s0x0:0x0!8m2!3d25.39451!4d-80.61768">https://www.google.com/maps/place/25%C2%B023'40.2%22N+80%C2%B037'03.7%22W/@25.3957506,-80.7028241,52006m/data=!3m1!1e3!4m5!3m4!1s0x0:0x0!8m2!3d25.39451!4d-80.61768</a> | 447 | hammock multiple; N or S side of Rte 9336?               |
| 3   | 30.806390 | -85.205610 | <a href="https://www.google.com/maps/place/30%C2%B048'23.0%22N+85%C2%B012'20.2%22W/@30.80639,-85.2099874,1447m/data=!3m1!1e3!4m5!3m4!1s0x0:0x0!8m2!3d30.80639!4d-85.20561">https://www.google.com/maps/place/30%C2%B048'23.0%22N+85%C2%B012'20.2%22W/@30.80639,-85.2099874,1447m/data=!3m1!1e3!4m5!3m4!1s0x0:0x0!8m2!3d30.80639!4d-85.20561</a>       | 500 | uncertain location                                       |
| 46  | 30.151120 | -84.241370 | <a href="https://www.google.com/maps/place/30%C2%B009'04.0%22N+84%C2%B014'28.9%22W/@30.15112,-84.2588795,6223m/data=!3m1!1e3!4m5!3m4!1s0x0:0x0!8m2!3d30.15112!4d-84.24137">https://www.google.com/maps/place/30%C2%B009'04.0%22N+84%C2%B014'28.9%22W/@30.15112,-84.2588795,6223m/data=!3m1!1e3!4m5!3m4!1s0x0:0x0!8m2!3d30.15112!4d-84.24137</a>       | 500 | 1.5 km from intersect; geocode centroid of property      |
| 241 | 28.012800 | -82.263900 | <a href="https://www.google.com/maps/place/28%C2%B000'46.1%22N+82%C2%B015'50.0%22W/@28.0128,-82.2682774,1588m/data=!3m1!1e3!4m5!3m4!1s0x0:0x0!8m2!3d28.0128!4d-82.2639">https://www.google.com/maps/place/28%C2%B000'46.1%22N+82%C2%B015'50.0%22W/@28.0128,-82.2682774,1588m/data=!3m1!1e3!4m5!3m4!1s0x0:0x0!8m2!3d28.0128!4d-82.2639</a>             | 500 | poorly defined region                                    |
| 268 | 26.976300 | -81.945600 | <a href="https://www.google.com/maps/place/26%C2%B058'34.7%22N+81%C2%B056'44.2%22W/@26.9763,-81.9806189,12826m/data=!3m1!1e3!4m5!3m4!1s0x0:0x0!8m2!3d26.9763!4d-81.9456">https://www.google.com/maps/place/26%C2%B058'34.7%22N+81%C2%B056'44.2%22W/@26.9763,-81.9806189,12826m/data=!3m1!1e3!4m5!3m4!1s0x0:0x0!8m2!3d26.9763!4d-81.9456</a>           | 500 | marsh                                                    |

|          |           |            |                                                                                                                                                                                                                                                                                                                                                 |     |                                                |
|----------|-----------|------------|-------------------------------------------------------------------------------------------------------------------------------------------------------------------------------------------------------------------------------------------------------------------------------------------------------------------------------------------------|-----|------------------------------------------------|
| DPI      | 30.481353 | -86.199822 | <a href="#">692 Piney Point Rd, Freeport, fl - Bing Maps</a>                                                                                                                                                                                                                                                                                    | 510 | business address; large plot of forested land, |
| 150      | 30.020300 | -84.408700 | <a href="https://www.google.com/maps/place/30%C2%B011'13.1%22N+84%C2%B024'31.3%22W/@30.0195986,-84.4170417,3115m/data=!3m1!1e3!4m5!3m4!1s0x0:0x0!8m2!3d30.0203!4d-84.4087">https://www.google.com/maps/place/30%C2%B011'13.1%22N+84%C2%B024'31.3%22W/@30.0195986,-84.4170417,3115m/data=!3m1!1e3!4m5!3m4!1s0x0:0x0!8m2!3d30.0203!4d-84.4087</a> | 566 | poorly defined region centroid of parcel       |
| 265      | 27.199700 | -81.988100 | <a href="https://www.google.com/maps/place/27%C2%B011'58.9%22N+81%C2%B059'17.2%22W/@27.1997,-82.1281757,51203m/data=!3m1!1e3!4m5!3m4!1s0x0:0x0!8m2!3d27.1997!4d-81.9881">https://www.google.com/maps/place/27%C2%B011'58.9%22N+81%C2%B059'17.2%22W/@27.1997,-82.1281757,51203m/data=!3m1!1e3!4m5!3m4!1s0x0:0x0!8m2!3d27.1997!4d-81.9881</a>     | 608 | on bridge over river                           |
| DPI<br>5 | 27.346740 | -80.332534 | <a href="#">810 Kitterman Rd, Fort Pierce, fl - Bing</a>                                                                                                                                                                                                                                                                                        | 608 | geocode to only house on plot                  |
| DPI<br>6 | 27.360310 | -80.489204 | <a href="#">Peacock Rd, Fort Pierce. fl - Bing</a>                                                                                                                                                                                                                                                                                              | 608 | road center farmland                           |
| DPI<br>7 | 25.588039 | -80.459183 | <a href="#">16300 SW 184 St, Miami, fl - Bing</a>                                                                                                                                                                                                                                                                                               | 806 | House on SW 192 but address is 184th           |
| 266      | 27.166000 | -80.687000 | <a href="https://www.google.com/maps/place/27%C2%B009'57.6%22N+80%C2%B041'13.2%22W/@27.166,-80.8270757,51219m/data=!3m1!1e3!4m5!3m4!1s0x0:0x0!8m2!3d27.166!4d-80.687">https://www.google.com/maps/place/27%C2%B009'57.6%22N+80%C2%B041'13.2%22W/@27.166,-80.8270757,51219m/data=!3m1!1e3!4m5!3m4!1s0x0:0x0!8m2!3d27.166!4d-80.687</a>           | 860 | in the field but locale uncertain              |



|           |           |            |                                                                                                                                                                                                                                                                                                                                                       |      |                                     |
|-----------|-----------|------------|-------------------------------------------------------------------------------------------------------------------------------------------------------------------------------------------------------------------------------------------------------------------------------------------------------------------------------------------------------|------|-------------------------------------|
| 39        | 30.174945 | -85.623249 | <a href="https://www.google.com/maps/place/30%C2%B010'29.8%22N+85%C2%B037'23.7%22W/@30.174945,-85.6407585,5825m/data=!3m1!1e3!4m5!3m4!1s0x0:0x0!8m2!3d30.174945!4d-85.623249">https://www.google.com/maps/place/30%C2%B010'29.8%22N+85%C2%B037'23.7%22W/@30.174945,-85.6407585,5825m/data=!3m1!1e3!4m5!3m4!1s0x0:0x0!8m2!3d30.174945!4d-85.623249</a> | 894  | center line W<br>bound E15th<br>St  |
| DPI<br>8  | 26.989992 | -82.130409 | <a href="#">766+Merrick+Ln+NW,+PORT+CHARLOTTE,+FL+33948 - Bing Maps</a>                                                                                                                                                                                                                                                                               | 1000 | OK?                                 |
| 238       | 28.038100 | -82.173300 | <a href="https://www.google.com/maps/place/28%C2%B002'17.2%22N+82%C2%B010'23.9%22W/@28.0381,-82.1908095,6352m/data=!3m1!1e3!4m5!3m4!1s0x0:0x0!8m2!3d28.0381!4d-82.1733">https://www.google.com/maps/place/28%C2%B002'17.2%22N+82%C2%B010'23.9%22W/@28.0381,-82.1908095,6352m/data=!3m1!1e3!4m5!3m4!1s0x0:0x0!8m2!3d28.0381!4d-82.1733</a>             | 1105 | pasture                             |
| DPI<br>9  | 27.267876 | -82.326286 | <a href="#">5703 Howard Creek Rd, Sarasota, fl - Bing</a>                                                                                                                                                                                                                                                                                             | 1140 | farm house;<br>forest to NE         |
| DPI<br>10 | 27.886591 | -82.059677 | <a href="#">8549 Carey Rd, Keyssville, fl - Bing</a>                                                                                                                                                                                                                                                                                                  | 1640 | farm house;<br>near Alafia<br>River |

|       |           |            | <i>Amblyomma americanum</i> convenience samples                          |               |                                                          |
|-------|-----------|------------|--------------------------------------------------------------------------|---------------|----------------------------------------------------------|
| ID    | Lat       | Long.      | Image                                                                    | Dist. SDM (m) | Local Site                                               |
| DPI1A | 28.422339 | -80.585442 | <a href="#">Maca Rd (at gate N of S Patrol Rd) cape canaveral - Bing</a> | 141           | Street intersection                                      |
| DPI2A | 26.726818 | -80.059035 | <a href="#">1508 Division Ave west palm beach, fl - Bing Maps</a>        | 224           | OK?                                                      |
| DPI3A | 28.264856 | -81.424484 | <a href="#">1448 Flamingo Blvd Kissimmee, fl - Bing</a>                  | 283           | OK?                                                      |
| DPI4A | 27.214910 | -80.794641 | <a href="#">3202 SE 33rd Terrace, okeechobee, fl - Bing</a>              | 700           | Distance to Okeechobee Battlefield State Park; coll 1989 |
| DPI5A | 27.293056 | -80.254572 | <a href="#">9416 Gumbo Limbo Ln, jensen beach - Bing</a>                 | 1200          | Inholding to state park                                  |
| DPI6A | 28.751011 | -82.535471 | <a href="#">35 Linder Circle homosassa, fl - Bing</a>                    | 1432          | 1.1 miles Homosassa WMG area                             |
| DPI7A | 27.910614 | -81.568062 | <a href="#">916 Primrose Way, lake wales, fl - Bing</a>                  | 2927          | Pine plantation in back yard                             |
| DPI8A | 26.982799 | -80.111567 | <a href="#">18231 SE Island Dr tequesta, fl - Bing</a>                   | 14009         | South end JD State Park                                  |

Supplemental Figure S1. Sites of tick surveys in Florida. *A. americanum* (A,B). (A) shows standard survey locations of *A. americanum* collected (filled circle) or never collected (open circle). (B) shows convenience locations from lizards (filled circle) or from public surveys (open circle). *I. scapularis* (C,D). (C) shows standard survey locations of *I. scapularis* collected (filled circle) or never collected (open circle). (D) shows convenience locations from lizards (open circle) or from public surveys (filled circle).

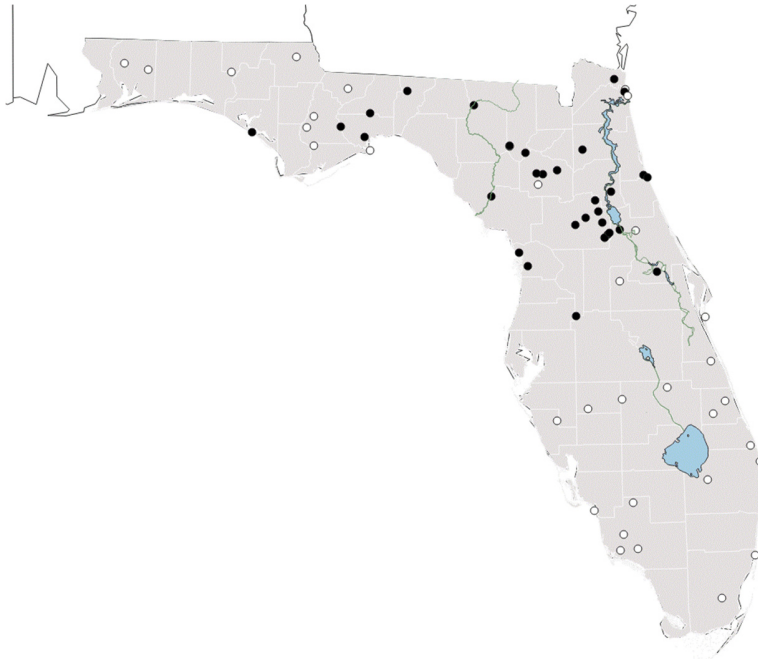

**B**

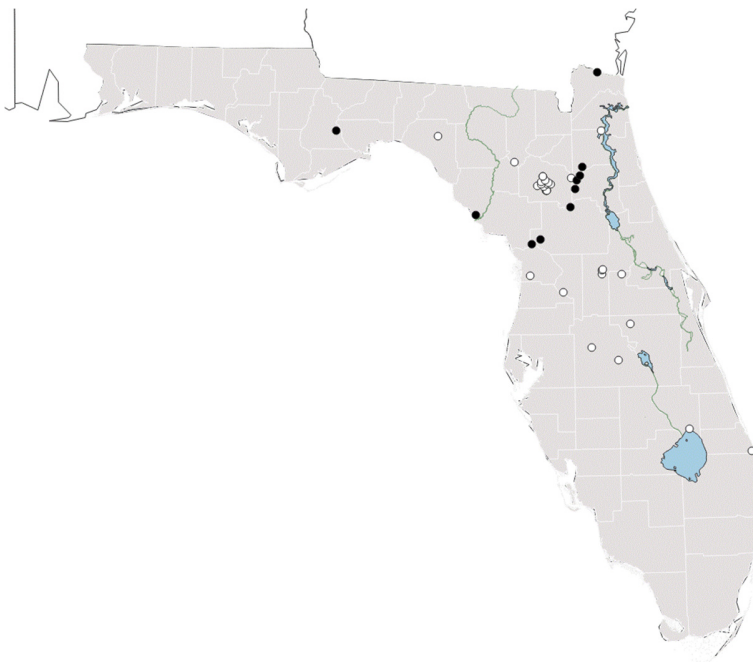

**C**

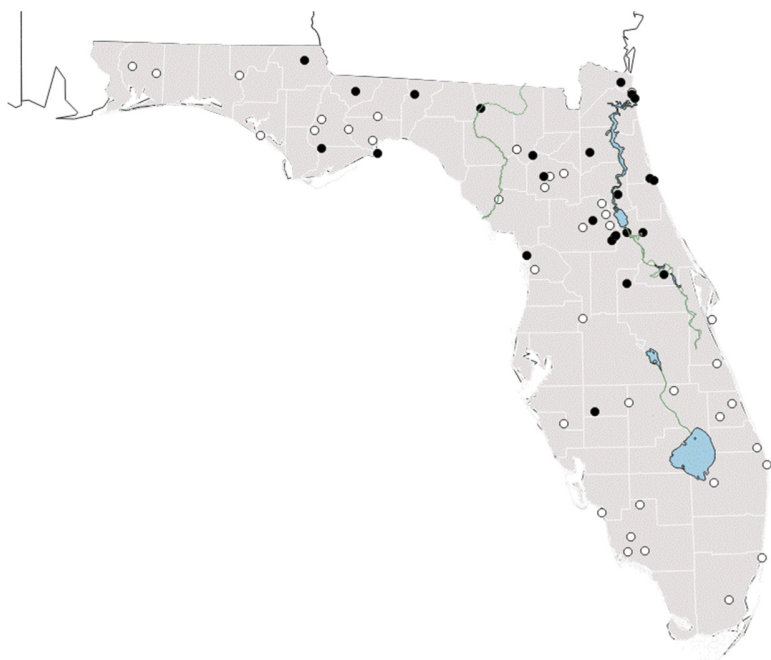

**D**

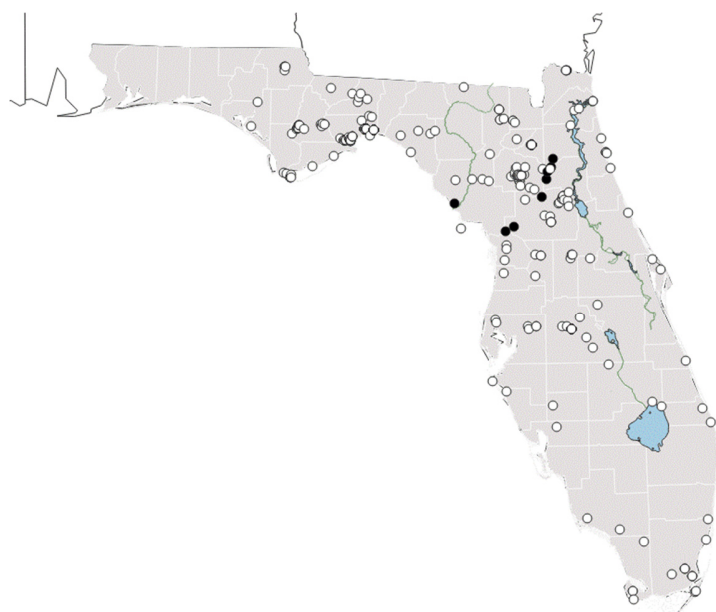

Supplement: s1 [file s1]
